# Supplementary material for: HDAC5 modulates PD-L1 expression and cancer immunity via p65 deacetylation in pancreatic cancer
Source: PubMed Central journal article supplement (PMC8899586; doi:10.7150/thno.69444), 2022-01-31
Supplement: thnov12p2080s1.pdf [file thnov12p2080s1.pdf]

Supplementary materials for

**HDAC5 modulates PD-L1 expression and cancer immunity via the  
deacetylation of p65 in pancreatic cancer**

Yingke Zhou, Xin Jin, Haixin Yu, Gengdu Qin, Penglin Pan, Jingyuan Zhao, Taoyu Chen, Xueyi Liang, Yan Sun, Bo Wang, Dianyun Ren, Shikai Zhu, Heshui Wu

**The file includes:**

- Supplementary figures and figure legends
- Supplementary Table S1. Sequence of primers and gene specific shRNAs
- Supplementary Table S2. Information of antibodies
- Supplementary Table S3. Information of chemicals
- Supplementary Table S4. Information of recombinant DNA
- Supplementary Table S5. TCGA samples included in this study
- Supplementary Table S6. Top20 Pathways negatively correlated with HDAC5 expression in the GSEA of TCGA pancreatic cancer dataset

## Supplementary figures

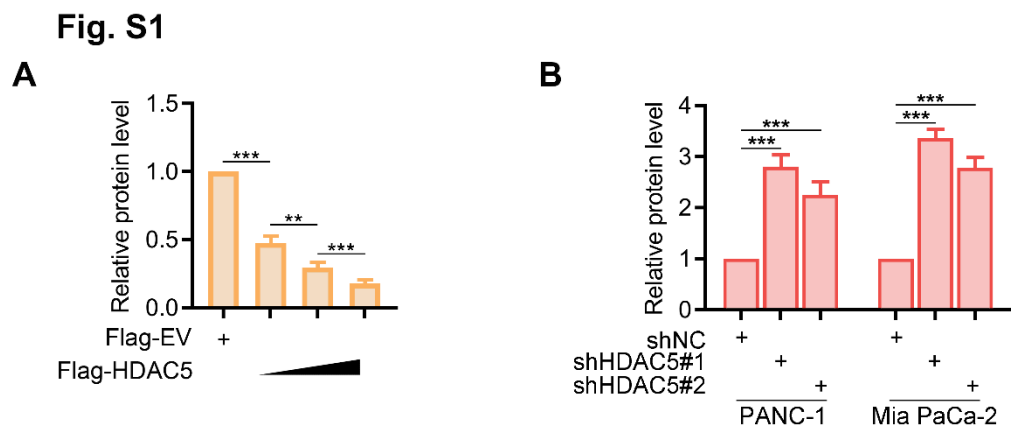

**Figure S1 Supplementary data to Figure 1**

(A) Histogram showing the relative protein level of PD-L1 in three independent replicates of the assay in Figure 1G. (B) Relative protein level of PD-L1 in Figure 1I (n=3).

**Fig. S2**

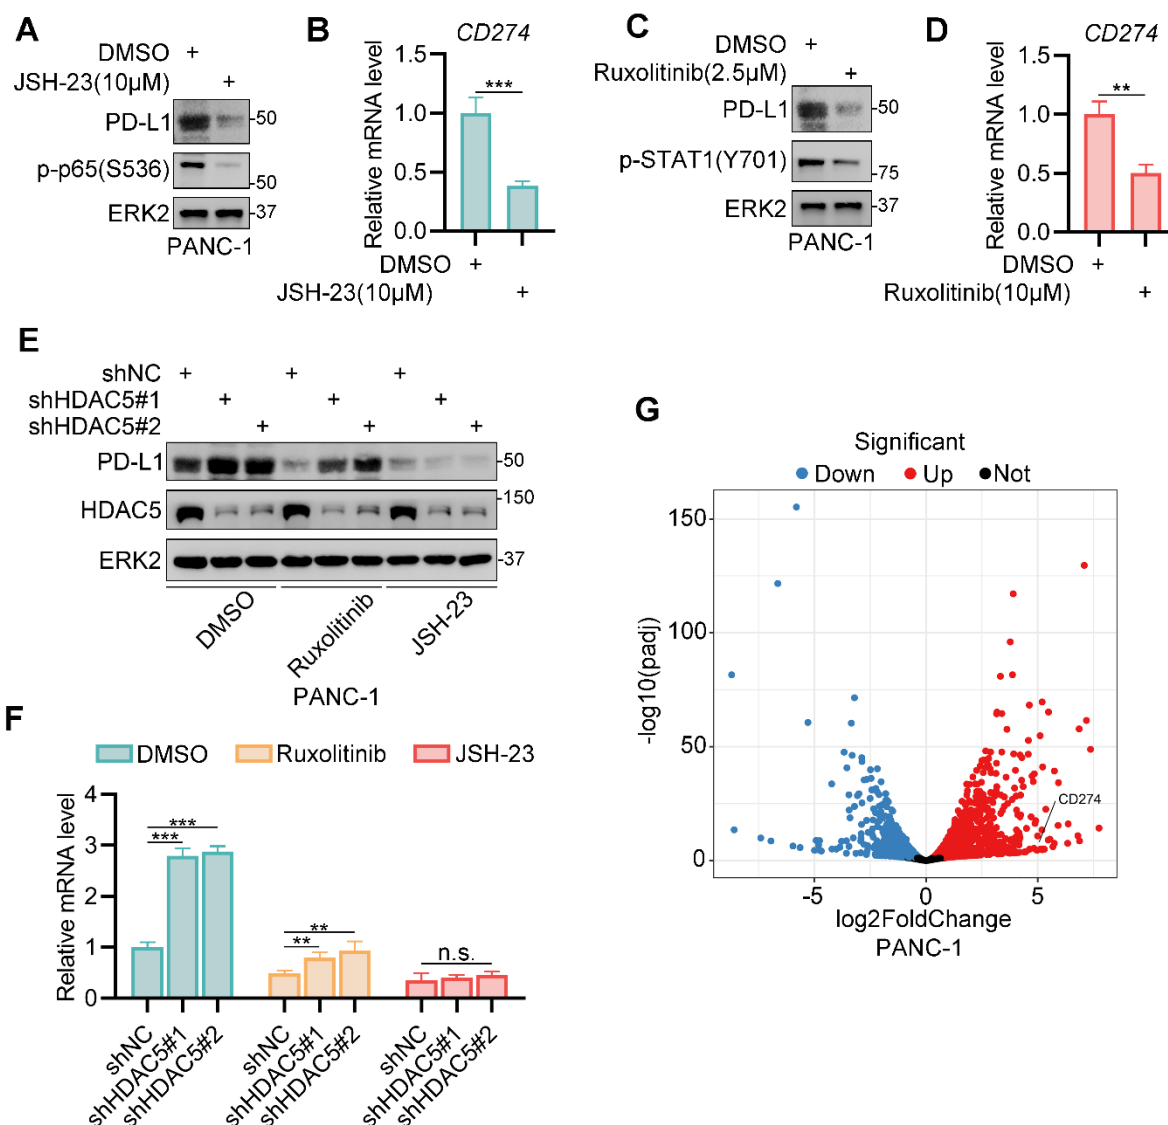

**Figure S2 Supplementary data to Figure 2**

(A-D) PANC-1 cells were treated with indicated chemicals for 24 h, and then were harvest for western blot (A, C) and RT-qPCR, data are shown as mean  $\pm$  SD (n= 3, \*\*  $P < 0.01$ , \*\*\*  $P < 0.001$ ) (B, D). (E-F) PANC-1 cells were infected with lenti-virus expressing indicated shRNAs for 48 h. After a 48 h puromycin selection, cells were treated with indicated drugs for 24 h (2.5 μM Ruxolitinib, 10 μM JSH-23). Then cells were harvested for western blot (E) and RT-qPCR. Data are shown as mean  $\pm$  SD (n = 3, n.s. not significant, \*\*  $P < 0.01$ ) (F). (G) Volcano plot depicting the differentially expressed genes (DEGs) in HDAC5 knock-down PANC-1 cells compared to control cells via RNA-seq.

**Fig. S3**

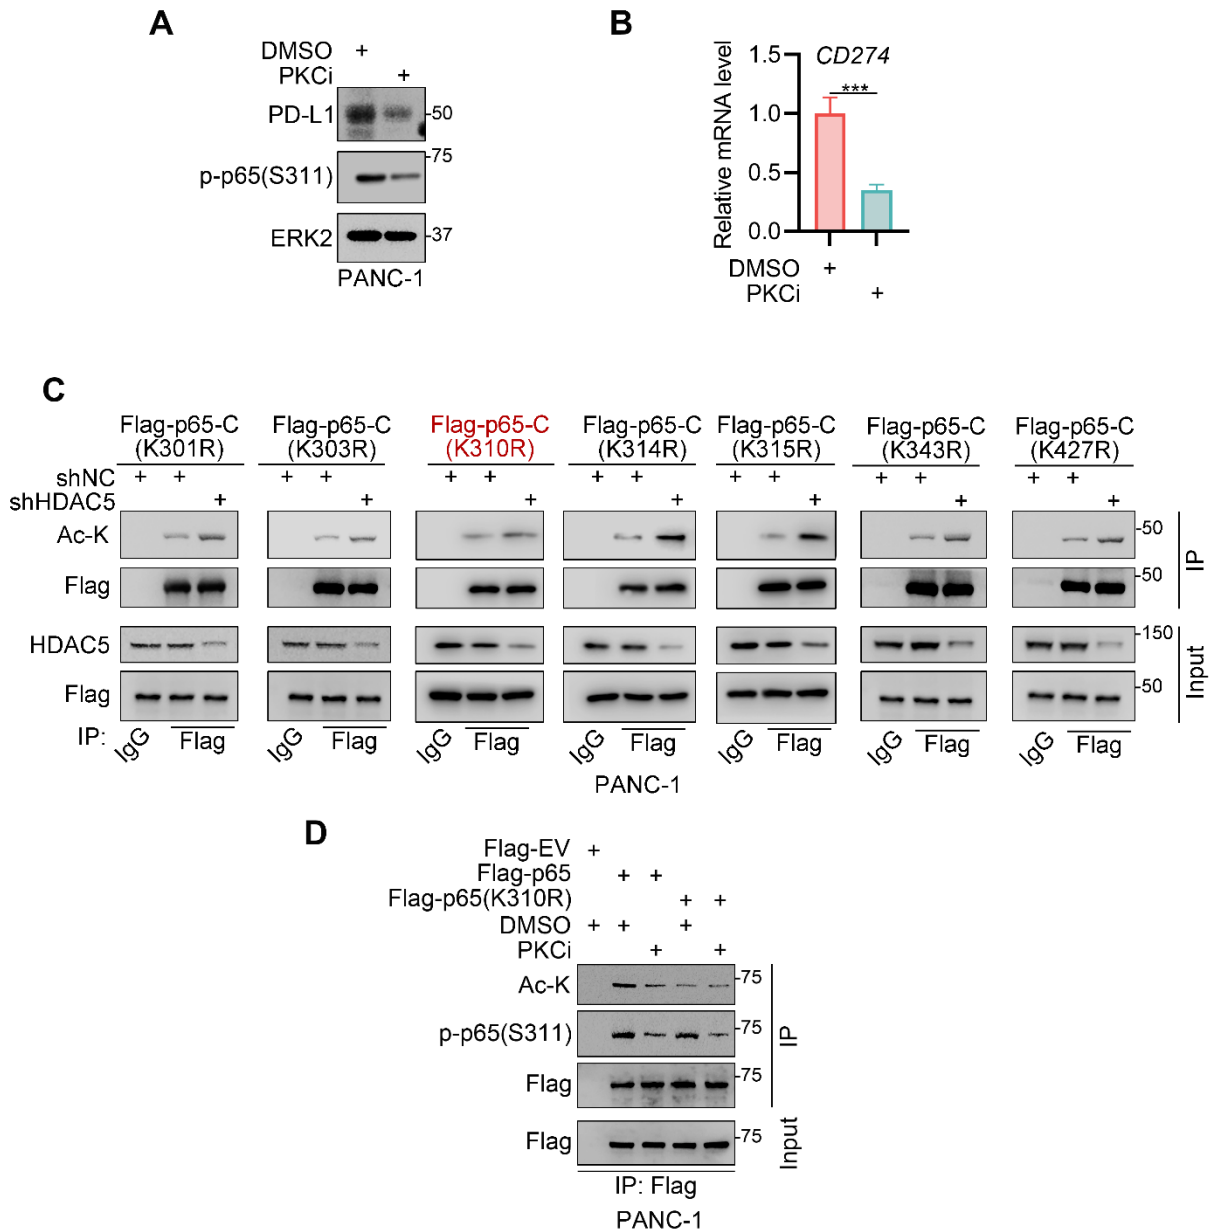

**Figure S3 PKC inhibitor represses PD-L1 expression and p65 acetylation**

(A-B) PANC-1 cells were treated with indicated drugs (Staurosporine, 1 $\mu$ M) for 24 h, and then were harvested for western blot (A) and RT-qPCR, data are shown as mean  $\pm$  SD (n= 3, \*\*\*  $P < 0.001$ ) (B). (C) PANC-1 cells were transfected with indicated plasmids for 48 h, then cells were harvested for co-IP assay. (D) PANC-1 cells were transfected with indicated plasmids, 24 h after transfection, cells were treated with indicated drugs for 24 h, and then were harvest for co-IP assay.

**Fig. S4**

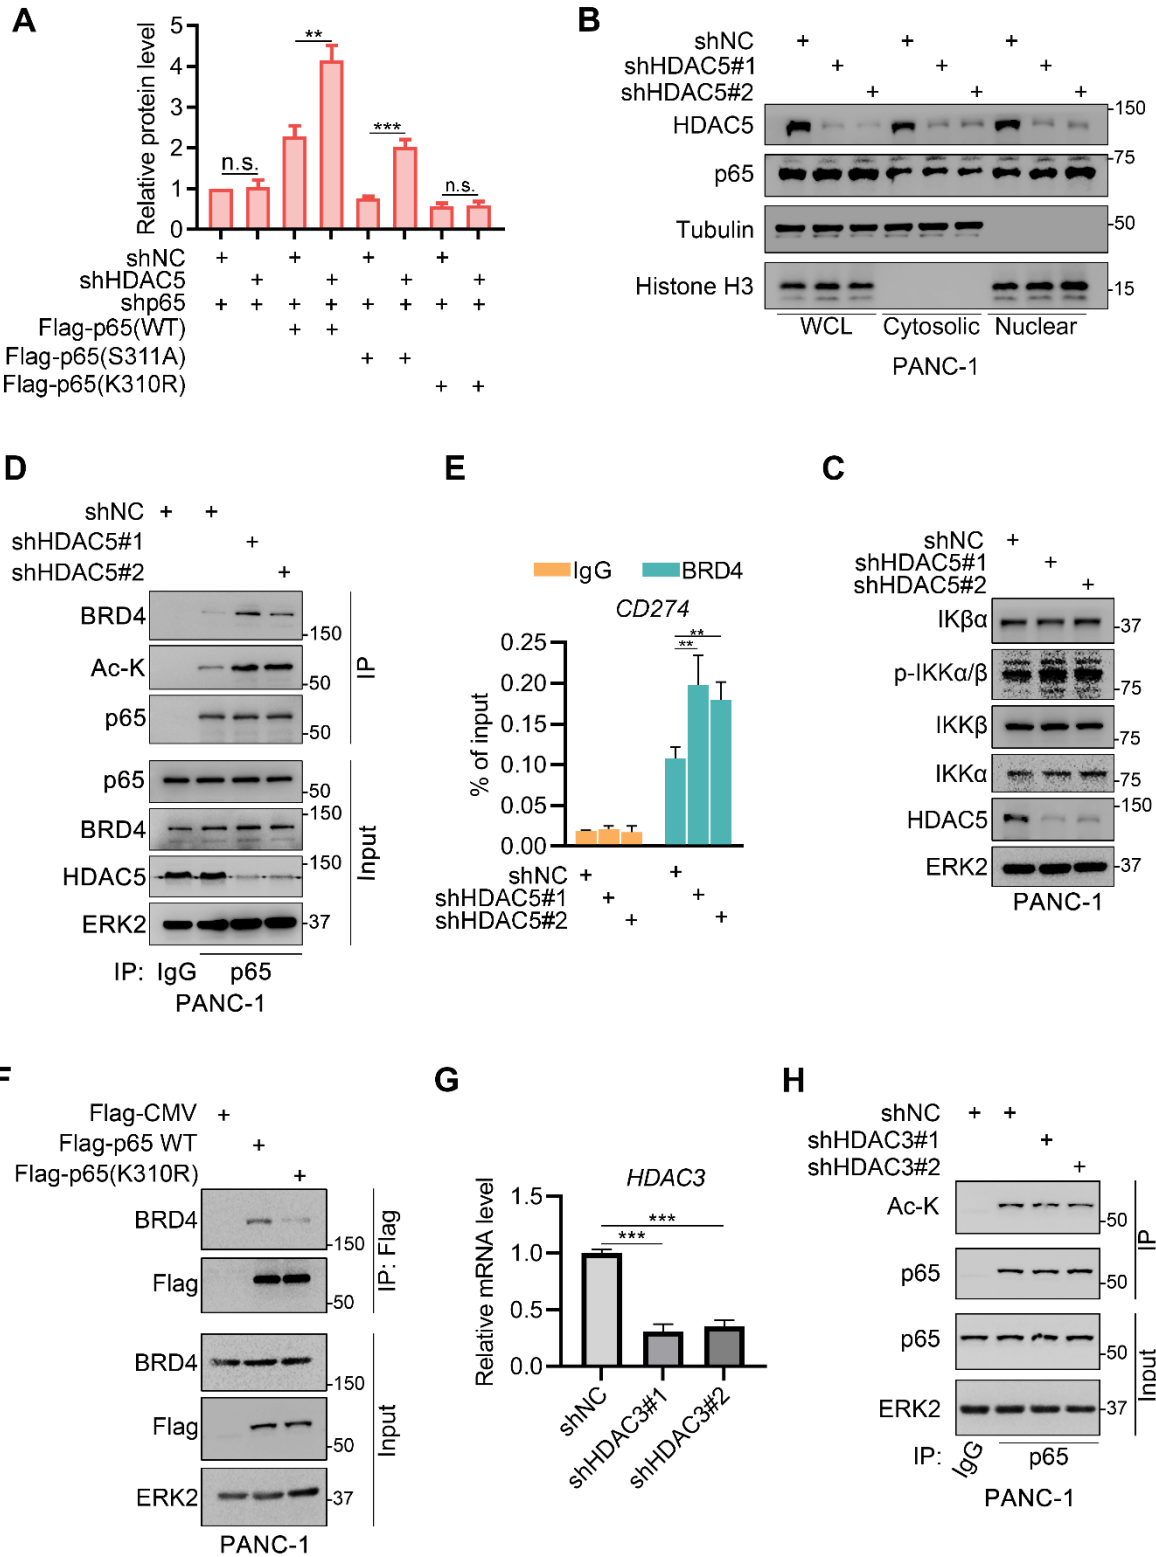

### **Figure S4 Acetylation on K310 of p65 promotes its binding with BRD4**

**(A)** Relative protein level of PD-L1 in Figure 5F (n= 3). **(B)** Western blot analysis of whole cell lysate (WCL), cytosolic fractionation and nuclear fractionation from PANC-1 cells after the knock-down of HDAC5. **(C-E)** PANC-1 cells were infected with indicated lenti-virus, after a 48 h puromycin selection, cells were harvested for western blot (C), co-IP (d) and ChIP-qPCR (E), data are shown as mean  $\pm$  SD (n= 3, \*\*  $P < 0.01$ ). **(F)** PANC-1 cells were transfected with indicated plasmids for 48 h, and cells were harvested for co-IP analysis. **(G-H)** PANC-1 cells were infected with lenti-virus expressing indicated shRNAs, and after a 48 h puromycin selection, cells were harvested for RT-qPCR (G) and co-IP analysis (H). Data are shown as mean  $\pm$  SD (n= 3, \*\*\*  $P < 0.001$ ).

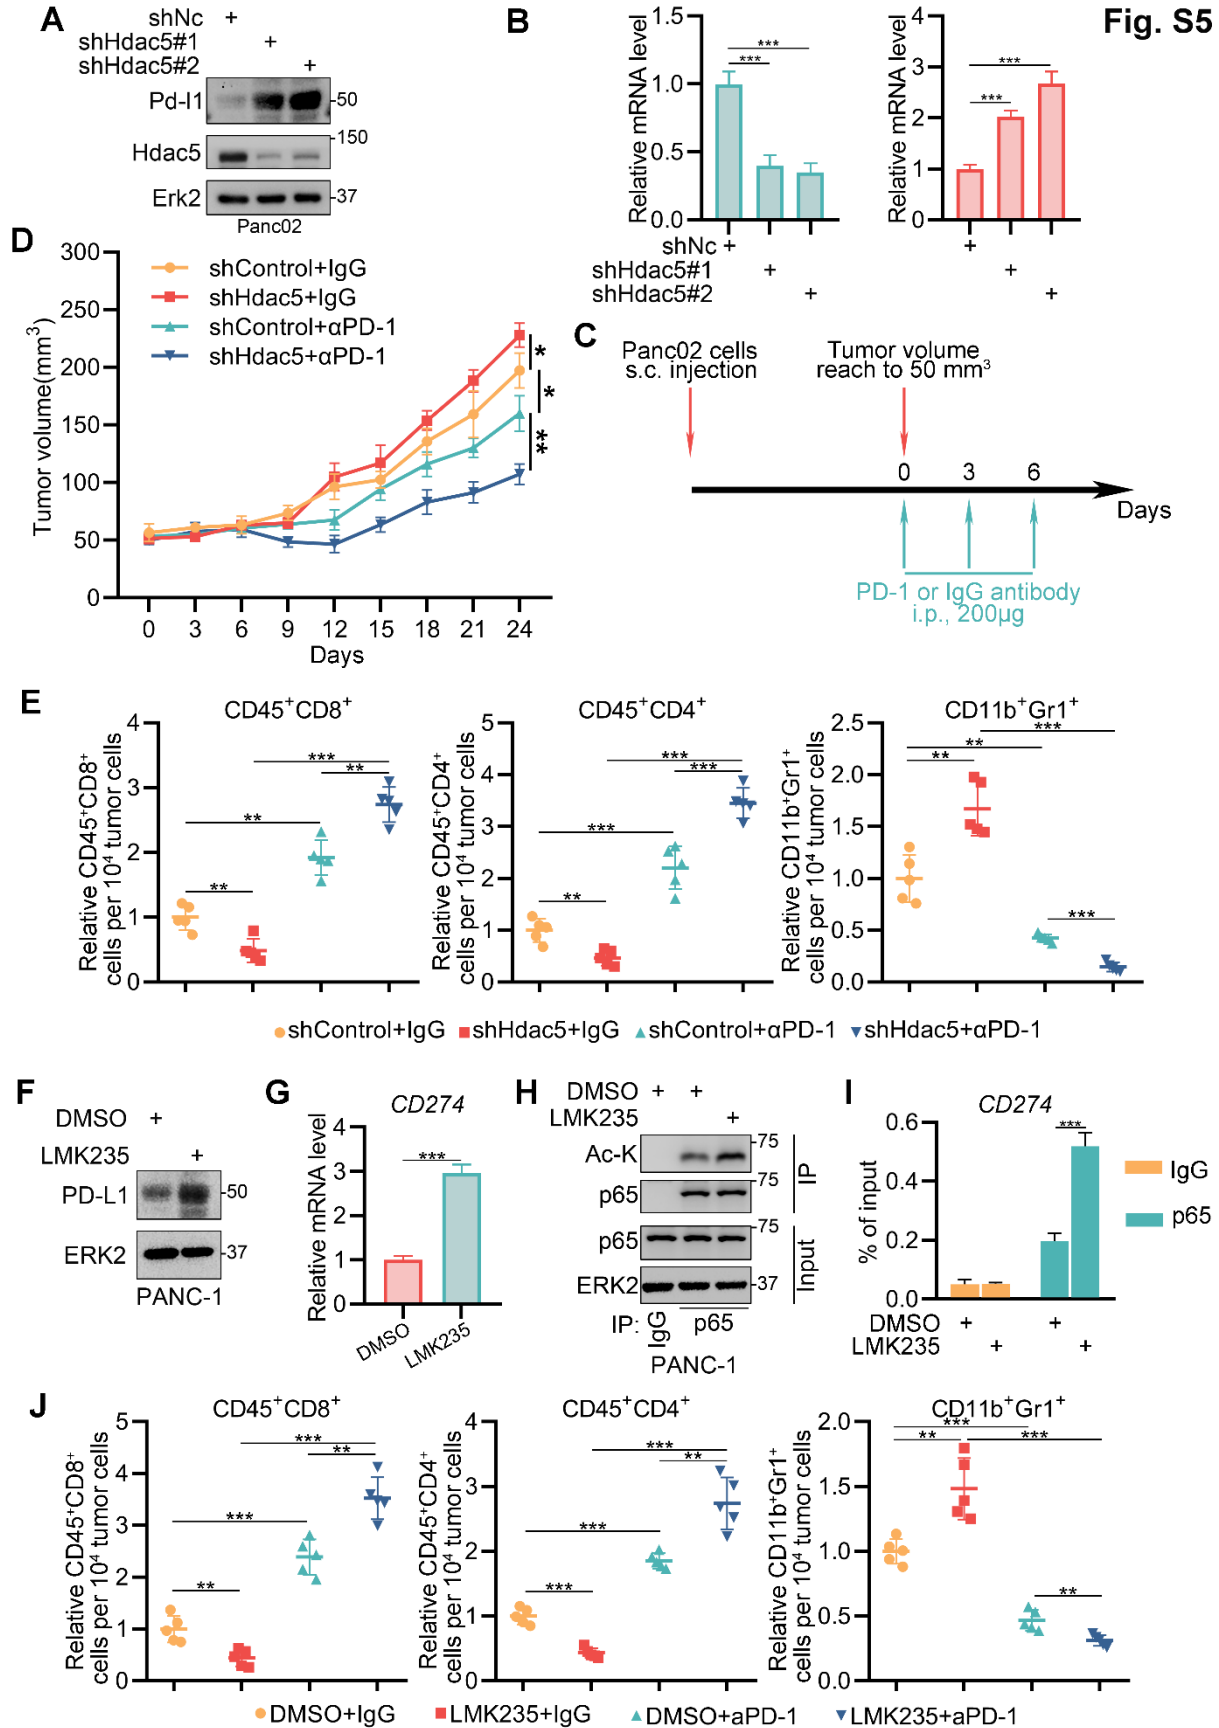

**Figure S5 HDAC5 silence or inhibition sensitize panc-02 derived PDAC mouse model to the treatment of  $\alpha$ -PD1**

**(A-B)** Panc 02 cells were infected with lentivirus expressing indicated shRNAs for 48 h. After 48 h puromycin selection, cells were harvested for western blot analysis (A) and RT-qPCR (B). Data are shown as mean  $\pm$  SD (n = 3, \*\*\* P < 0.001). **(C)** Schematic diagram depicting the treatment plan for mice bearing subcutaneous Panc 02 tumors. **(D)** Growth curve of tumors in different groups. Data are shown as mean  $\pm$  SD (n = 5), \* P < 0.05, \*\* P < 0.01. **(E)** At the end of the treatment, the numbers of CD45+CD8+ T cells, CD45+CD4+ T cells, and CD11b+Gr1+ myeloid cells that infiltrated in tumors in different treatments were analyzed by FACS. Data are shown as mean  $\pm$  SD (n = 5), \*\* P < 0.01, \*\*\* P < 0.001. **(F-G)** PANC-1 cells were treated with indicated drugs for 24 h, and cells were harvested for western blot (f) and RT-qPCR, data are shown as mean  $\pm$  SD (n= 3, \*\*\* P < 0.001) (g). **(H-I)** PANC-1 cells were treated with indicated drugs for 24 h, and cells were harvested for co-IP (H) and ChIP-qPCR, data are shown as mean  $\pm$  SD (n= 3, \*\*\* P < 0.001) (I). **(J)** FACS analysis of tumor infiltrated CD45+CD8+ T cells, CD45+CD4+ T cells, and CD11b+Gr1+ myeloid cells in indicated treatment group.



**A**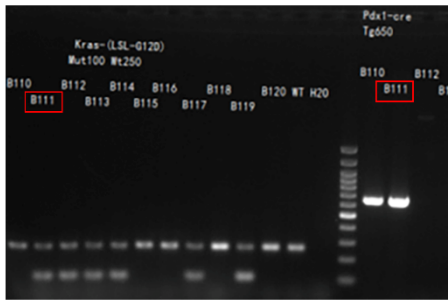**B****Fig. S6**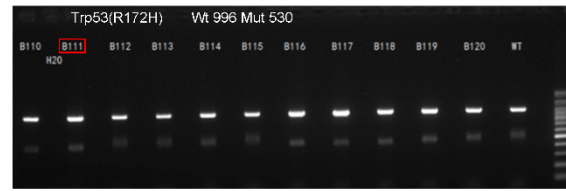**C**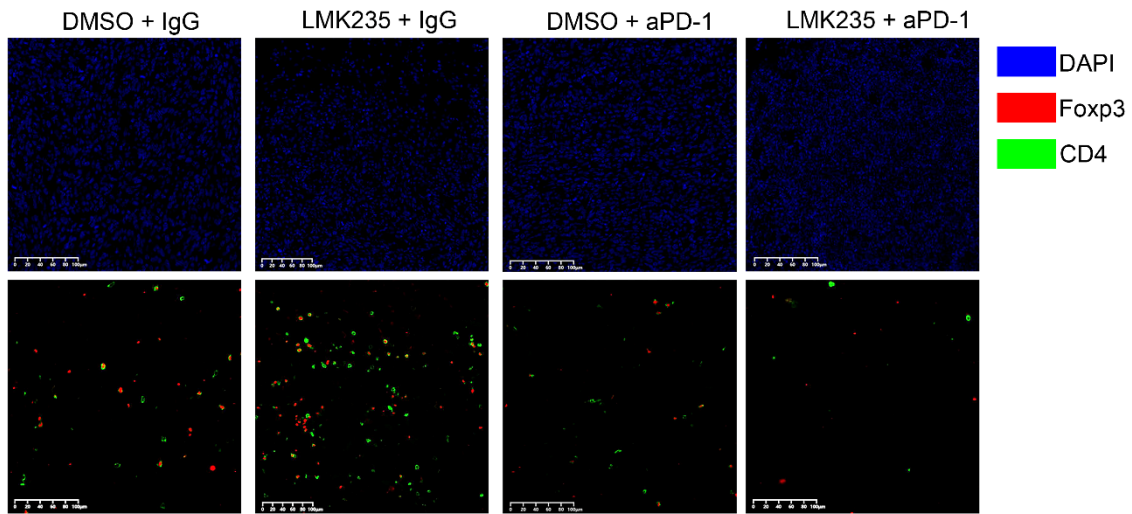**D**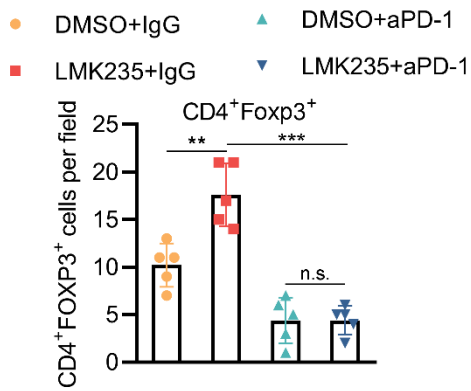**F**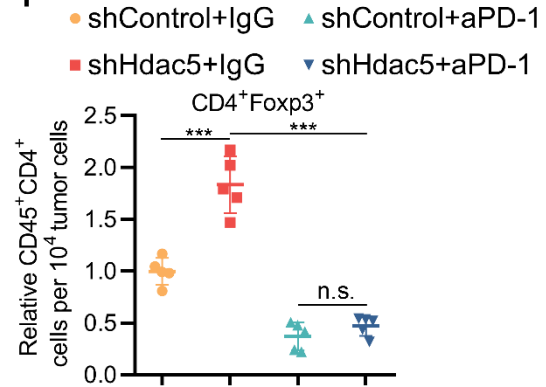**E**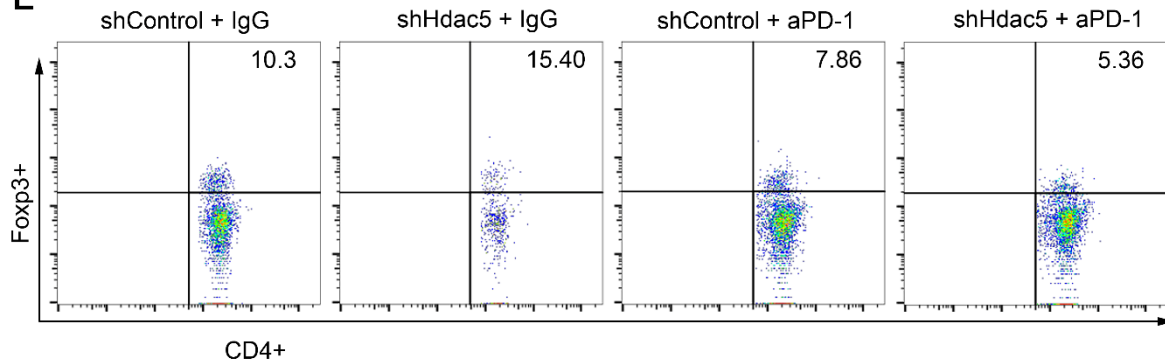

### Figure S6 Supplementary data to mouse work

**(A-B)** Genotyping of the autochthonous KPC mouse (*Kras*<sup>G12D/+</sup>; *LSLTrp53*<sup>R172H/+</sup>; *Pdx-1-Cre*) used in Figure 6. **(C-D)** Representative images of immunofluorescence staining of tumor samples in indicated group (C), and the quantification data (D). Data are shown as mean  $\pm$  SD (n = 5), n.s. not significant, \*\*  $P < 0.01$ , \*\*\*  $P < 0.001$ . **(E-F)** FACS analysis of tumor infiltrated CD4<sup>+</sup>Foxp3<sup>+</sup> Treg cells in indicated groups (E) and quantification data (F). Data are shown as mean  $\pm$  SD (n = 5), n.s. not significant, \*\*\*  $P < 0.001$ .

**Table S1. Sequence of primers and gene specific shRNAs**

| <b>Gene</b>              | <b>Usage</b>                                                  | <b>Forward</b>            | <b>Reverse</b>              |
|--------------------------|---------------------------------------------------------------|---------------------------|-----------------------------|
| <i>GAPDH</i>             | RT-qPCR                                                       | ACCCAGAAGACTGTGGAT<br>GG  | TTCAGCTCAGGGATGACC<br>TT    |
| <i>CD274</i>             | RT-qPCR                                                       | GGTGCCGACTACAAGCGA<br>AT  | AGCCCTCAGCCTGACATG<br>TC    |
| <i>RELA</i>              | RT-qPCR                                                       | TGGCCCCTATGTGGAGAT<br>CA  | GTATCTGTGCTCCTCTCGC<br>C    |
| <i>HDAC5</i>             | RT-qPCR                                                       | CTGCGGAACAAGGAGAA<br>GAG  | GGGAACTCTGGTCCAAAG<br>AA    |
| <i>HDAC3</i>             | RT-qPCR                                                       | CCTTTTCCAGCCAGTCATC<br>AG | AACATTTCCGACAGTGTA<br>GCC   |
| <i>Gapdh</i>             | RT-qPCR                                                       | AGGTTGTCTCCTGCGACTT<br>CA | GGGTGGTCCAGGGTTTCT<br>TACT  |
| <i>Hdac5</i>             | RT-qPCR                                                       | GACCAACCCACTGTGGTG<br>AA  | TCCAGTGTGGCTTTACGA<br>CC    |
| <i>Cd274</i>             | RT-qPCR                                                       | AATGCTGCCCTTCAGATC<br>AC  | ATAACCCTCGGCCTGACA<br>TA    |
| <i>CD274</i><br>promoter | ChIP-<br>qPCR                                                 | GCACTTTAGGACGGAGGG<br>TC  | CTCTACTGCCCCCTAGAC<br>CA    |
| <i>CD274</i><br>enhancer | ChIP-<br>qPCR                                                 | GGAGAGGCACTAAGAGG<br>GAAA | AAGCATGAGGAATACGGA<br>AGTCA |
| <b>shRNAs</b>            | <b>Sequence</b>                                               |                           |                             |
| sh-HDAC5-1               | CCGGGACTGTTATTAGCACCTTTAACTCGAGTTAAAGGTGCTAATA<br>ACAGTCTTTTT |                           |                             |
| sh-HDAC5-2               | CCGGGCTAGAGAAAGTCATCGAGATCTCGAGATCTCGATGACTTTC<br>TCTAGCTTTTT |                           |                             |
| sh-p65-1                 | CCGGCGGATTGAGGAGAAACGTAAACTCGAGTTTACGTTTCTCCTC<br>AATCCGTTTT  |                           |                             |
| sh-p65-2                 | CCGGCACCATCAACTATGATGAGTTCTCGAGAACTCATCATAGTTG<br>ATGGTGTTTTT |                           |                             |
| sh-HADC3-1               | CCGGCCTTCCACAAATACGGAAATTCTCGAGAATTTCCGTATTTGT<br>GGAAGGTTTTT |                           |                             |
| sh-HADC3-2               | CCGGCGGTCTCTATAAGAAGATGATCTCGAGATCATCTTCTTATAG<br>AGACCGTTTTT |                           |                             |

**Table S2. Information of antibodies**

| <b>Antibodies</b>                                                                 | <b>Source</b>             | <b>Identifier</b>                  | <b>Working dilution</b> |
|-----------------------------------------------------------------------------------|---------------------------|------------------------------------|-------------------------|
| Rabbit monoclonal anti-PD-L1                                                      | Cell Signaling Technology | Cat # 13684S; RRID: AB_2687655     | 1:1000                  |
| Rabbit polyclonal anti-Flag-tag                                                   | Proteintech               | Cat # 20543-1-AP; RRID: AB11232216 | 1:1000                  |
| Rabbit monoclonal anti-ERK2                                                       | Cell Signaling Technology | Cat # 9108; RRID: AB_2141156       | 1:3000                  |
| Rabbit polyclonal anti-HDAC5                                                      | Abcam                     | Cat # AB55403; RRID: AB_880353     | 1:1000                  |
| Rabbit polyclonal anti-H3K27-ac                                                   | Abcam                     | Cat# AB4729; RRID: AB_2118291      | 1:1000                  |
| Rabbit monoclonal anti-p65                                                        | Cell Signaling Technology | Cat # 8242S; RRID: AB_10860244     | 1:2000                  |
| Rabbit monoclonal anti-RelB                                                       | Cell Signaling Technology | Cat# 10544; RRID: AB_2797727       | 1:1000                  |
| Rabbit polyclonal anti-c-Rel                                                      | Cell Signaling Technology | Cat# 4727; RRID: AB_2178843        | 1:1000                  |
| Rabbit polyclonal anti-p52                                                        | Cell Signaling Technology | Cat# 4882; RRID: AB_10695537       | 1:1000                  |
| Rabbit polyclonal anti-p50                                                        | Cell Signaling Technology | Cat# 3035; RRID: AB_330564         | 1:2000                  |
| Rabbit monoclonal anti-p-AKT(S473)                                                | Cell Signaling Technology | Cat# 4060; RRID: AB_2315049        | 1:1000                  |
| Rabbit monoclonal anti-p-p65(S536)                                                | Cell Signaling Technology | Cat# 3033; RRID: AB_331284         | 1:1000                  |
| Rabbit polyclonal anti-p-p65(S311)                                                | Abcam                     | Cat# ab194926                      | 1:1000                  |
| Rabbit acetylated lysine antibody                                                 | Cell Signaling Technology | Cat# 9441; RRID: AB_331805         | 1:1000                  |
| Rabbit monoclonal anti-BRD4                                                       | Cell Signaling Technology | Cat# 13440; RRID: AB_2687578       | 1:800                   |
| Rabbit monoclonal anti-p-STAT1                                                    | Cell Signaling Technology | Cat# 9167; RRID: AB_561284         | 1:1000                  |
| Rabbit monoclonal anti- $\beta$ -Tubulin                                          | Cell Signaling Technology | Cat# 2128; RRID: AB_823664         | 1:2000                  |
| Rabbit polyclonal anti-Histone-H3                                                 | Proteintech               | Cat# 17168-1-AP; RRID: AB_2716755  | 1:1000                  |
| Mouse monoclonal anti-I $\kappa$ B $\alpha$                                       | Cell Signaling Technology | Cat# 4814; RRID: AB_390781         | 1:1000                  |
| Mouse monoclonal anti-IKK $\alpha$                                                | Cell Signaling Technology | Cat# 11930; RRID: AB_2687618       | 1:1000                  |
| Mouse monoclonal anti-IKK $\beta$                                                 | Cell Signaling Technology | Cat# 8943; RRID: AB_11024092       | 1:1000                  |
| Rabbit monoclonal anti-p- IKK $\alpha$ / $\beta$ (S176/180)                       | Cell Signaling Technology | Cat# 2697; RRID: AB_2079382        | 1:1000                  |
| Mouse anti-rabbit IgG (Conformation specific) monoclonal antibody (HRP conjugate) | Cell Signaling Technology | Cat# 5127; RRID: AB_10892860       | 1:4000                  |
| Goat anti-mouse polyclonal antibody                                               | AMSBIO                    | Cat# BA1050-1; RRID: AB_10892412   | 1:4000                  |
| Rabbit monoclonal anti-CD4                                                        | Abcam                     | Cat# ab194926; RRID: AB_2686917    | 1:2000                  |
| Rabbit monoclonal anti-FOXP3                                                      | Cell Signaling Technology | Cat# 12653; RRID: AB_2797979       | 1:1000                  |

**Table S3. Information of chemicals**

| <b>Chemicals</b> | <b>Source</b>  | <b>Identifier</b> |
|------------------|----------------|-------------------|
| Ruxolitinib      | Tsbiochem      | T1829             |
| JSH-23           | Tsbiochem      | T1930             |
| Staurosporine    | Tsbiochem      | T6680             |
| LMK235           | MedChemExpress | HY-18998          |

**Table S4. Information of recombinant DNA**

| <b>Recombinant DNA</b> | <b>Source</b> | <b>Identifier</b> |
|------------------------|---------------|-------------------|
| Flag-HDAC5             | Addgene       | Cat# 58905        |
| pCMV4-p65              | Addgene       | Cat# 21966        |

**Table S5. TCGA samples included in this study**

| No | Sample Id    | No  | Sample Id    | No  | Sample Id    |
|----|--------------|-----|--------------|-----|--------------|
| 1  | TCGA-F2-6879 | 51  | TCGA-IB-A5SO | 101 | TCGA-IB-AAUO |
| 2  | TCGA-HZ-7919 | 52  | TCGA-IB-A5SP | 102 | TCGA-IB-AAUR |
| 3  | TCGA-HZ-7922 | 53  | TCGA-IB-A5SQ | 103 | TCGA-IB-AAUS |
| 4  | TCGA-HZ-7925 | 54  | TCGA-IB-A5SS | 104 | TCGA-2L-AAQE |
| 5  | TCGA-HZ-7926 | 55  | TCGA-IB-A5ST | 105 | TCGA-2L-AAQI |
| 6  | TCGA-IB-7644 | 56  | TCGA-OE-A75W | 106 | TCGA-2L-AAQJ |
| 7  | TCGA-IB-7646 | 57  | TCGA-PZ-A5RE | 107 | TCGA-3A-A9IB |
| 8  | TCGA-IB-7647 | 58  | TCGA-Q3-A5QY | 108 | TCGA-3A-A9IH |
| 9  | TCGA-IB-7649 | 59  | TCGA-US-A774 | 109 | TCGA-3A-A9IU |
| 10 | TCGA-IB-7651 | 60  | TCGA-US-A779 | 110 | TCGA-FB-AAPS |
| 11 | TCGA-IB-7652 | 61  | TCGA-US-A77E | 111 | TCGA-HV-AA8X |
| 12 | TCGA-IB-7885 | 62  | TCGA-US-A77G | 112 | TCGA-LB-A9Q5 |
| 13 | TCGA-IB-7886 | 63  | TCGA-HV-A7OL | 113 | TCGA-RB-AA9M |
| 14 | TCGA-IB-7887 | 64  | TCGA-HZ-A77O | 114 | TCGA-XD-AAUL |
| 15 | TCGA-IB-7888 | 65  | TCGA-HZ-A77P | 115 | TCGA-2J-AAB1 |
| 16 | TCGA-IB-7889 | 66  | TCGA-IB-A6UF | 116 | TCGA-2J-AAB4 |
| 17 | TCGA-HZ-8001 | 67  | TCGA-IB-A6UG | 117 | TCGA-2J-AAB6 |
| 18 | TCGA-HZ-8002 | 68  | TCGA-LB-A7SX | 118 | TCGA-2J-AAB8 |
| 19 | TCGA-HZ-8003 | 69  | TCGA-RB-A7B8 | 119 | TCGA-2J-AAB9 |
| 20 | TCGA-HZ-8005 | 70  | TCGA-US-A776 | 120 | TCGA-2J-AABA |
| 21 | TCGA-IB-7645 | 71  | TCGA-HZ-A77Q | 121 | TCGA-2J-AABE |
| 22 | TCGA-IB-7890 | 72  | TCGA-HZ-A8P0 | 122 | TCGA-2J-AABF |
| 23 | TCGA-IB-7891 | 73  | TCGA-IB-A7LX | 123 | TCGA-2J-AABH |
| 24 | TCGA-IB-7893 | 74  | TCGA-IB-A7M4 | 124 | TCGA-2J-AABI |
| 25 | TCGA-IB-7897 | 75  | TCGA-LB-A8F3 | 125 | TCGA-2J-AABK |
| 26 | TCGA-H6-8124 | 76  | TCGA-S4-A8RP | 126 | TCGA-2J-AABO |
| 27 | TCGA-HZ-8315 | 77  | TCGA-XN-A8T3 | 127 | TCGA-2J-AABR |
| 28 | TCGA-HZ-8317 | 78  | TCGA-XN-A8T5 | 128 | TCGA-2J-AABT |
| 29 | TCGA-HZ-8519 | 79  | TCGA-YB-A89D | 129 | TCGA-2J-AABU |
| 30 | TCGA-HZ-8636 | 80  | TCGA-YY-A8LH | 130 | TCGA-2J-AABV |
| 31 | TCGA-HZ-8637 | 81  | TCGA-F2-A8YN | 131 | TCGA-3A-A9IX |
| 32 | TCGA-IB-8126 | 82  | TCGA-HZ-A8P1 | 132 | TCGA-3A-A9IZ |
| 33 | TCGA-IB-8127 | 83  | TCGA-IB-AAUM | 133 | TCGA-3A-A9J0 |
| 34 | TCGA-F2-A44G | 84  | TCGA-IB-AAUP | 134 | TCGA-FB-AAPQ |
| 35 | TCGA-F2-A44H | 85  | TCGA-IB-AAUT | 135 | TCGA-FB-AAPU |
| 36 | TCGA-FB-A4P5 | 86  | TCGA-IB-AAUU | 136 | TCGA-FB-AAPY |
| 37 | TCGA-FB-A545 | 87  | TCGA-Q3-AA2A | 137 | TCGA-FB-AAPZ |
| 38 | TCGA-H6-A45N | 88  | TCGA-S4-A8RM | 138 | TCGA-FB-AAQ0 |
| 39 | TCGA-HV-A5A3 | 89  | TCGA-S4-A8RO | 139 | TCGA-FB-AAQ1 |
| 40 | TCGA-HV-A5A4 | 90  | TCGA-YH-A8SY | 140 | TCGA-FB-AAQ2 |
| 41 | TCGA-HV-A5A5 | 91  | TCGA-2L-AAQA | 141 | TCGA-FB-AAQ3 |
| 42 | TCGA-HV-A5A6 | 92  | TCGA-2L-AAQL | 142 | TCGA-FB-AAQ6 |
| 43 | TCGA-HZ-A49G | 93  | TCGA-3A-A9I5 | 143 | TCGA-HV-AA8V |
| 44 | TCGA-HZ-A49H | 94  | TCGA-3A-A9I7 | 144 | TCGA-HZ-A9TJ |
| 45 | TCGA-HZ-A49I | 95  | TCGA-3A-A9I9 | 145 | TCGA-IB-AAUQ |
| 46 | TCGA-HZ-A4BH | 96  | TCGA-3A-A9IC | 146 | TCGA-XD-AAUG |
| 47 | TCGA-HZ-A4BK | 97  | TCGA-3E-AAAY | 147 | TCGA-XD-AAUH |
| 48 | TCGA-M8-A5N4 | 98  | TCGA-3E-AAAZ | 148 | TCGA-XD-AAUI |
| 49 | TCGA-FB-A5VM | 99  | TCGA-F2-A7TX | 149 | TCGA-Z5-AAPL |
| 50 | TCGA-FB-A78T | 100 | TCGA-IB-AAUN |     |              |

**Table S6. Top20 Pathways negatively correlated with HDAC5 expression in the GSEA of TCGA pancreatic cancer dataset**

| NAME                                                         | SIZE | ES             | NES           | NOM p-val       | FDR q-val       |
|--------------------------------------------------------------|------|----------------|---------------|-----------------|-----------------|
| GO_REGULATION_OF_ADAPTIVE_IMMUNE_RESPONSE                    | 10   | 0.69948<br>554 | 2.1251<br>383 | 0               | 0.062428<br>206 |
| GO_REGULATION_OF_LYMPHOCYTE_MEDIATED_IMMUNITY                | 9    | 0.69419<br>044 | 2.0632<br>77  | 0               | 0.095410<br>75  |
| GO_REGULATION_OF_T_CELL_MEDIATED_IMMUNITY                    | 7    | 0.72584<br>79  | 1.9704<br>568 | 0               | 0.210245<br>19  |
| GO_NUCLEOBASE_CONTAINING_COMPOUND_TRANSPORT                  | 6    | 0.72824<br>55  | 1.8846<br>893 | 0.001324<br>503 | 0.245700<br>5   |
| GO_ADAPTIVE_IMMUNE_RESPONSE                                  | 21   | 0.48549<br>57  | 1.8720<br>814 | 0.005561<br>736 | 0.256721<br>02  |
| GO_T_CELL_MEDIATED_CYTOTOXICITY                              | 6    | 0.71677<br>446 | 1.8303<br>968 | 0.006648<br>936 | 0.358446<br>36  |
| GO_REGULATION_OF_T_CELL_MEDIATED_CYTOTOXICITY                | 6    | 0.71677<br>446 | 1.7940<br>089 | 0.001345<br>895 | 0.473937<br>15  |
| GO_POSITIVE_REGULATION_OF_LEUKOCYTE_MEDIATED_CYTOTOXICITY    | 6    | 0.70194<br>76  | 1.7898<br>837 | 0.002673<br>797 | 0.422858<br>74  |
| GO_POSITIVE_REGULATION_OF_CELL_KILLING                       | 6    | 0.70194<br>76  | 1.7879<br>941 | 0.006535<br>948 | 0.402082<br>83  |
| GO_CELL_KILLING                                              | 7    | 0.64395<br>1   | 1.7634<br>822 | 0.007509<br>387 | 0.420184<br>58  |
| GO_REGULATION_OF_LEUKOCYTE_MEDIATED_CYTOTOXICITY             | 7    | 0.64395<br>1   | 1.7475<br>206 | 0.006305<br>17  | 0.461274<br>5   |
| GO_ANTIGEN_PROCESSING_AND_PRESENTATION_OF_ENDOGENOUS_ANTIGEN | 4    | 0.78195<br>61  | 1.7426<br>296 | 0.008733<br>625 | 0.459104<br>4   |
| GO_REGULATION_OF_CELL_KILLING                                | 7    | 0.64395<br>1   | 1.7359<br>372 | 0.007905<br>139 | 0.463249<br>36  |
| GO_LEUKOCYTE_MEDIATED_CYTOTOXICITY                           | 7    | 0.64395<br>1   | 1.7247<br>698 | 0.010389<br>61  | 0.466168<br>64  |
| GO_MEMORY                                                    | 5    | 0.70831<br>72  | 1.7177<br>576 | 0.012362<br>638 | 0.474781<br>6   |
| GO_NEUROTRANSMITTER_METABOLIC_PROCESS                        | 9    | 0.58436<br>62  | 1.7170<br>41  | 0.011292<br>347 | 0.458317<br>22  |
| GO_RESPONSE_TO_GROWTH_FACTOR                                 | 21   | 0.44217<br>79  | 1.6737<br>25  | 0.015401<br>54  | 0.571121<br>93  |
| GO_MUSCLE_CELL_DIFFERENTIATION                               | 8    | 0.59127<br>44  | 1.6658<br>747 | 0.011378<br>002 | 0.589056<br>9   |
| GO_NEGATIVE_REGULATION_OF_BLOOD_PRESSURE                     | 3    | 0.80712<br>16  | 1.6198<br>041 | 0.020408<br>163 | 0.794124<br>9   |
| GO_REGULATION_OF_CYSTEINE_TYPE_ENDOPEPTIDASE_ACTIVITY        | 7    | 0.59265<br>1   | 1.6138<br>635 | 0.031454<br>783 | 0.805498<br>66  |
